# Supplementary material
Source: PubMed Central journal article supplement (PMC4437465)
Supplement: NIHMS683700-supplement-Supp_TableS4-S5___FigureS1-S2.pdf [file NIHMS683700-supplement-Supp_TableS4-S5___FigureS1-S2.pdf]

## Supplemental Information

**Supplemental Figure S1: Thin layer chromatography of EUR\_01860 enzyme hydrolysis products after 2 hours at 37°C.** EUR\_01860 (1µg/ml) hydrolysis of 5mM maltotetraose (G4), 5mM maltohexaose (G6) and 0.3% glycogen (Glyc). Lane C is a TLC control consisting of 2 nmol each of glucose (Glc), maltose (G2), maltotriose (G3), maltotetraose (G4), maltopentaose (G5), maltohexaose (G6), maltoheptaose (G7).

**Supplemental Figure S2: Sedimentation velocity results for maltooligosaccharide binding proteins from *Eubacterium rectale*.** Shown are van Holde - Weischet diffusion corrected sedimentation coefficient distributions for three mutants in the presence (circles) and absence (triangles) of maltooligosaccharide. Red: EUR\_01830 (maltotriose); blue: EUR\_01240 (glucose); green: EUR\_31480 (maltose). In all cases, the sedimentation coefficient distribution increased when the oligosaccharide was added, suggestive of maltooligosaccharide binding.

**Supplemental Table S1:** Complete list of proteins identified among all samples; ANOVA analysis p-value reflects statistical significance in protein quantities among the three groups of samples (APM, GLU and H7) See excel spreadsheet.

**Supplemental Table S2:** Supplemental Table S2: Complete list of proteins  $\geq 3$ -fold more abundant in APM or H7 compared to GLU ( $\geq 5^*$  spectra counts). See excel spreadsheet.

**Supplemental Table S3:** Supplemental Table S3: Complete list of proteins  $\geq 3$ -fold upregulated in GLU compared to APM or H7 ( $\geq 5^*$  spectra counts). See excel spreadsheet.

**Supplemental Table S4: Weight - average sedimentation coefficients for each proteins in the apo form and with 1 mM maltooligosaccharide.**

| <b>Species:</b> | <b>M</b> | <b>s (apo)</b> | <b>s (ligand)</b> | <b>C (μM)</b> |
|-----------------|----------|----------------|-------------------|---------------|
| EUR_01830       | 42.7     | 3.37 (3.39)    | 3.47 (3.51)       | 17.8 (6.51)   |
| EUR_01240       | 43.4     | 3.63 (3.67)    | 3.89 (3.61)       | 14.5 (5.09)   |
| EUR_31480       | 48.4     | 4.05 (4.07)    | 4.21 (4.21)       | 9.71 (3.26)   |

Values in parentheses reflect the results from the 3-fold lower concentration measurements. The slight increase in *s* seen in the lower concentration is due to decreased concentration-dependent non-ideality. Molar mass (*M*, g/mol) estimated from sequence, weight-average sedimentation coefficient (*s* x 10<sup>-13</sup>) obtained from the enhanced van Holde – Weischet distributions.

**Supplemental Table S5: Primers**

| Name              | Sequence                                                                     | Construct/<br>purpose     |
|-------------------|------------------------------------------------------------------------------|---------------------------|
| EUR_01830_nhis    | 5'-CATCATCACCACCATCACGAGAACCTG<br>TACTTCCAGGGCAGCGGCAACGGAGGAAATGGA-3'       | EUR_01830<br>– pETiteNhis |
| EUR_01830_end     | 5'-GTGGCGGCCGCTCTATTATTTAAGAGAATCATTAAAG-3'                                  |                           |
| EUR_31480_nhis    | 5'-<br>CATCATCACCACCATCACGAGAACCTGTACTTCCAGGGCGG<br>AGACGGAACAGAGAAAGGCTC-3' | EUR_31480-<br>pETiteNhis  |
| EUR_31480_end     | 5'-<br>GTGGCGGCCGCTCTATTACTGCTCGTTCTGAAGATCCCAG-<br>3'                       |                           |
| EUR_01240_Nhis    | 5'-CATCATCACCACCATCACGAGAACCTGTACTTCCAGGGC<br>TCAGATGGGGGTTCTTCTGATAC-3'     | EUR_10240-<br>pETiteNhis  |
| EUR_01240_end     | 5'-GTGGCGGCCGCTCTATTACTGGTTCAAAGAGCTGTATA<br>AG-3'                           |                           |
| EUR_21010_Nhis    | 5'-CATCATCACCACCATCACGAGAACCTGTACTTCCAGGGC<br>GATACATCCGACACAGGAAGCTC-3'     | EUR_21010-<br>pETiteNhis  |
| EUR_21010_end     | 5'-<br>GTGGCGGCCGCTCTATTATTCTGAGATGTCAGGATATTTTC-3'                          |                           |
| EUR_01860_Nnat    | 5'-GAAGGAGATATACATATGGGTGGAAGAATACCGAGACG-<br>3'                             | EUR_01860-<br>pETiteChis  |
| EUR_01860_Chis    | 5'-GTGATGGTGGTGATGATGCTTCAAACAAGCACCGAATA-<br>3'                             |                           |
| EUR_21100_130Nnat | 5'-GAAGGAGATATACATATGGCTGCGAGCCCGACAATCCG-3'                                 | EUR_21000-<br>pETiteChis  |
| EUR_21100_Chis    | 5'-GTGATGGTGGTGATGATGAGCTGCTTTTTTAGTGTCATTC-<br>3'                           |                           |

|               |                                |                      |
|---------------|--------------------------------|----------------------|
| EUR_21100_for | 5'-GTAGTGAGATGCCGATTGAGC-3'    | qPCR                 |
| EUR_21100_rev | 5'-CGTATGTATCTGTACCACTTGC-3'   |                      |
| EUR_01860_for | 5'-GTGCTGCGGGTGGAAAGAATAC-3'   | qPCR                 |
| EUR_01860_rev | 5'-AATGCCGTCACCGTCACTGTC-3'    |                      |
| EUR_01830_for | 5'-AGCGGCAACGGAGGAAATGGA-3'    | qPCR                 |
| EUR_01830_rev | 5'-TTGCCTTAGCGAATGCCTCACACT-3' |                      |
| EUR_31480_for | 5'-GGAAGAGAGAAAGGCTCATC-3'     | qPCR                 |
| EUR_31480_rev | 5'-CCATCAGCTGCTGTTACTAC-3'     |                      |
| EUR_01240_for | 5'-TCTTGGAACAGGCGTAGA-3'       | qPCR                 |
| EUR_01240_rev | 5'-CCATGTTCCGATTGCATTTTC-3'    |                      |
| GapA_for      | 5'-TGGTCGTATCGGACGTCTTGCTTT-3' | qPCR<br>(normalizer) |
| GapA_rev      | 5'-TGCAGAAACCTCATCTGCATGCTC-3' |                      |

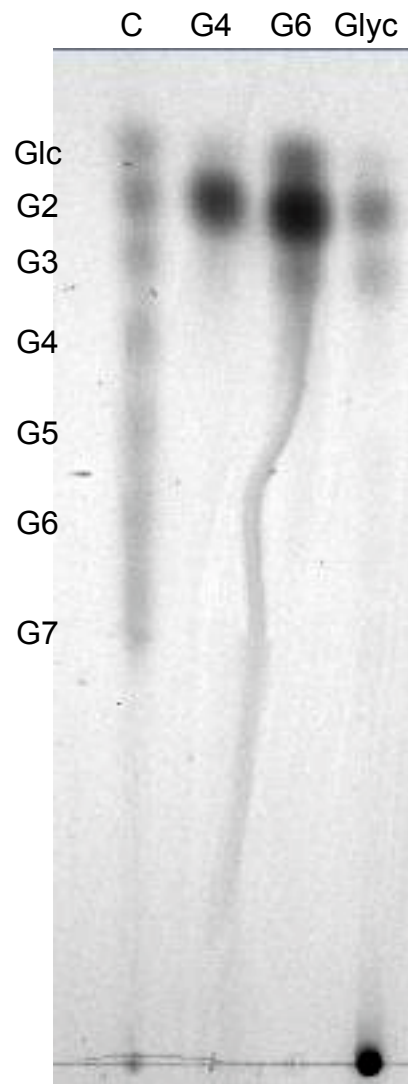

Supplemental Figure S1

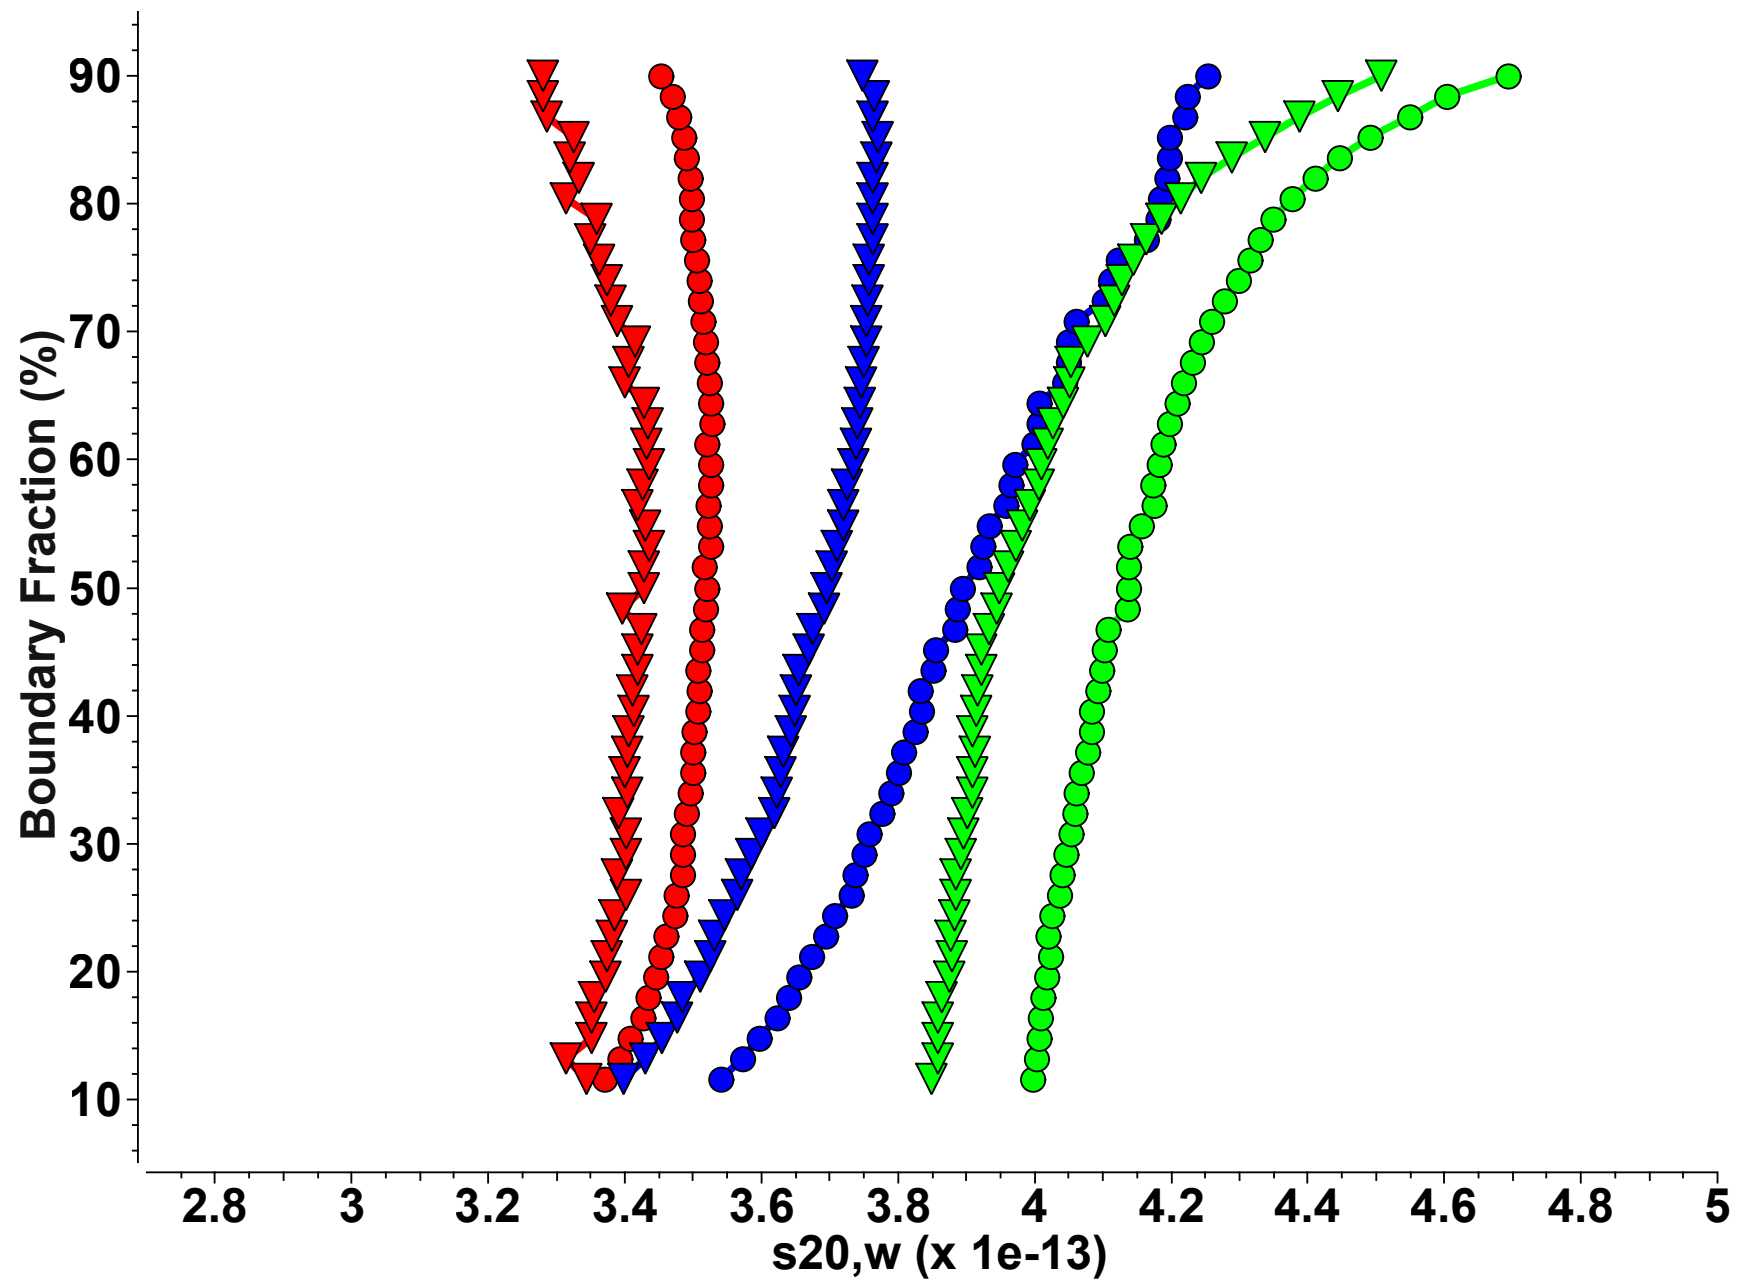

Supplemental Figure S2
